# Supplementary material for: Effect of a multimethod quality improvement intervention on antipsychotic medication use among residents of long-term care
Source: PubMed Central journal article supplement — BMJ Open Qual. 2021 Apr 12;10(2):e001211. doi: 10.1136/bmjoq-2020-001211 (PMC8051411; doi:10.1136/bmjoq-2020-001211), 2021-04-12
Supplement: bmjoq-2020-001211supp001.pdf [file bmjoq-2020-001211supp001.pdf]

Hanson HM, Léveillé T, Cole M, et al.

Effect of a multi-method quality improvement intervention on antipsychotic medication use among residents of long-term care.  
*BMJ Open Qual* 2021.

## Supplementary File

Table S1  
 Clinical Probability Inputs Used in the Economic Model

| Variable                                                    | No AUA project              |                            | AUA project                 |                            |
|-------------------------------------------------------------|-----------------------------|----------------------------|-----------------------------|----------------------------|
|                                                             | Antipsychotic use           | No antipsychotic use       | Antipsychotic use           | No antipsychotic use       |
| Probability of inappropriate antipsychotic use (SE; 95% CI) | 0.281 (0.0022; 0.279-0.288) |                            | 0.219 (0.0020; 0.215-0.223) |                            |
| Probability of improvement in NPS (SE; 95% CI)              | 0.728 (0.013; 0.702-0.754)  | 0.800 (0.010; 0.781-0.819) | 0.730 (0.016; 0.698-0.761)  | 0.774 (0.011; 0.752-0.796) |
| Probability of ED visit (SE; 95% CI)                        | 0.057 (0.006; 0.045-0.069)  | 0.043 (0.005; 0.034-0.053) | 0.094 (0.0015; 0.065-0.125) | 0.048 (0.008; 0.033-0.063) |
| Probability of hospitalization (SE; 95% CI)                 | 0.067 (0.006; 0.054-0.080)  | 0.045 (0.003; 0.038-0.052) | 0.146 (0.035; 0.076-0.216)  | 0.044 (0.004; 0.036-0.051) |

Hanson HM, Léveillé T, Cole M, et al.

Effect of a multi-method quality improvement intervention on antipsychotic medication use among residents of long-term care.  
*BMJ Open Qual* 2021.

Table S2

Cost Inputs Used in the Economic Model (in 2014 CAD)

|                                                             | Estimated total cost | Estimated cost per resident | Minimum  | Maximum  | Sources                                                                                                                                                                                                                                                  |
|-------------------------------------------------------------|----------------------|-----------------------------|----------|----------|----------------------------------------------------------------------------------------------------------------------------------------------------------------------------------------------------------------------------------------------------------|
| <b>AUA project</b>                                          |                      |                             |          |          |                                                                                                                                                                                                                                                          |
| Learning Workshops (LWs)                                    | \$77,535.74          | \$43.10                     | \$21.55  | \$64.65  | AUA project records;<br>Minimum and maximum estimates are within +/-50% of the average calculated estimate                                                                                                                                               |
| Project Staff                                               | \$459,234.00         |                             |          |          |                                                                                                                                                                                                                                                          |
| Manager (0.5 FTE for 20mo)                                  |                      |                             |          |          |                                                                                                                                                                                                                                                          |
| Administrative assistant (0.75 FTE for 20mo)                |                      |                             |          |          |                                                                                                                                                                                                                                                          |
| Practice leads (1.0 FTE for 15mo and 1.0 FTE for 12mo)      |                      |                             |          |          |                                                                                                                                                                                                                                                          |
| Nurse educator [education content writer] (1.0 FTE for 4mo) |                      |                             |          |          |                                                                                                                                                                                                                                                          |
| Other expenses                                              | \$87,026.00          |                             |          |          |                                                                                                                                                                                                                                                          |
| <b>Inappropriate antipsychotic use (per day)</b>            | --                   | \$0.34                      | \$0.17   | \$0.50   | AUA project records;<br>Minimum and maximum estimates are within +/-50% of the average calculated estimate                                                                                                                                               |
| <b>Emergency Department (ED) visit</b>                      | --                   | \$500.23                    | \$250.12 | \$750.35 | Hospital ED costs estimated from CIHI Report on Seniors ED Visits in Ontario;<br>Emergency physician costs estimated from Provincial Schedule of Medical Benefits;<br>Minimum and maximum estimates are within +/-50% of the average calculated estimate |
| <b>Hospitalization</b>                                      | --                   | \$21,514                    | \$21,476 | \$22,074 | Average hospital costs, and minimum and maximum estimates were provided from the CIHI Patient Cost Estimator                                                                                                                                             |

Hanson HM, Léveillé T, Cole M, et al.

Effect of a multi-method quality improvement intervention on antipsychotic medication use among residents of long-term care.

BMJ Open Qual 2021.

Table S3

Results of Select One-Way Sensitivity and Scenario Analyses Comparing AUA Project to No AUA Project

| Inputs                                                                                          | Strategy       | Cost (\$) | Incremental cost (\$) | Effectiveness (inappropriate antipsychotic avoided) | Incremental effectiveness (inappropriate antipsychotic avoided) | Incremental cost per inappropriate antipsychotic avoided |
|-------------------------------------------------------------------------------------------------|----------------|-----------|-----------------------|-----------------------------------------------------|-----------------------------------------------------------------|----------------------------------------------------------|
| <i>One-way sensitivity analyses</i>                                                             |                |           |                       |                                                     |                                                                 |                                                          |
| Probability of inappropriate antipsychotic use:<br>Decreased by 50% (0.1405),<br>No AUA project | No AUA project | 1,088.72  | --                    | 0.860                                               | --                                                              | --                                                       |
|                                                                                                 | AUA project    | 1,543.14  | 454.42                | 0.781                                               | -0.079                                                          | DOMINATED<br>(-\$5,788.77)                               |
| Increased by 50% (0.4215),<br>No AUA project                                                    | No AUA project | 1,293.89  | --                    | 0.579                                               | --                                                              | --                                                       |
|                                                                                                 | AUA project    | 1,543.14  | 249.74                | 0.781                                               | 0.203                                                           | \$1,233.29                                               |
| Decreased by 50% (0.1095),<br>AUA project                                                       | No AUA project | 1,191.06  | --                    | 0.719                                               | --                                                              | --                                                       |
|                                                                                                 | AUA project    | 1,271.63  | 80.58                 | 0.891                                               | 0.172                                                           | \$469.83                                                 |
| Increased by 50% (0.3285),<br>AUA project                                                       | No AUA project | 1,191.06  | --                    | 0.719                                               | --                                                              | --                                                       |
|                                                                                                 | AUA project    | 1,814.64  | 623.58                | 0.672                                               | -0.048                                                          | DOMINATED<br>(-\$13,128.09)                              |
| <i>Scenario analysis</i>                                                                        |                |           |                       |                                                     |                                                                 |                                                          |
| In-kind costs of intervention implementation                                                    | No AUA project | 1,191.06  | --                    | 0.719                                               | --                                                              | --                                                       |
|                                                                                                 | AUA project    | 1,755.38  | 564.33                | 0.781                                               | 0.062                                                           | \$9,102.09                                               |

Hanson HM, Léveillé T, Cole M, et al.

Effect of a multi-method quality improvement intervention on antipsychotic medication use among residents of long-term care.

*BMJ Open Qual* 2021.

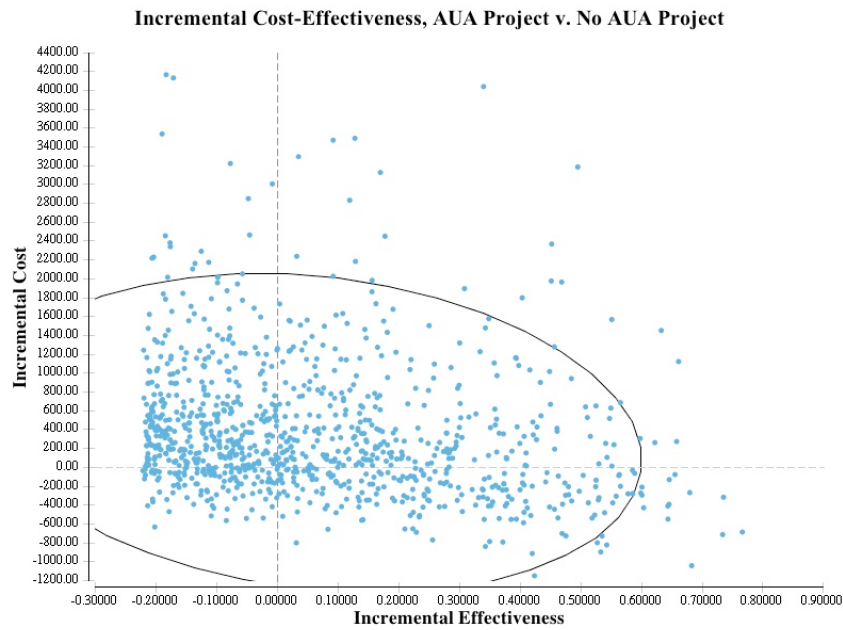

Figure S1: Monte Carlo incremental scatterplot showing the probabilistic sensitivity analysis of AUA project compared to no AUA project.
